# Supplementary material
Source: Elsevier journal article supplement (https://www.sciencedirect.com/science/article/pii/S0009739X19301162)
Supplement: mmc1 [file S0009739X19301162:mmc1.docx]

**ANEXO PARTICIPANTES**

Joan Fabregat Prous/Lluis Secanella – Hospital Universitari Bellvitge. Barcelona

Javier Larrea y Olea - Hospital Universitario Insular de Gran Canaria

Francisco Sanchez Bueno – Hospital Clinico Universitario Virgen de la Arrixaca Murcia.

Francisco Botello Martinez - Hospital Universitario Infanta Cristina. Badajoz

Javier Briceño - Hospital Reina Sofía. Córdoba

Alberto Miyar De León- Hospital Universitario Central de Asturias. Oviedo

Mario Serradilla/Alejandro Serrablo. Hospital Universitario Miguel Servet. Zaragoza

Joana Ferrer Fabrega/ S.Sanchez Cabús – Hospital Clinic. Barcelona

Miguel Angel Gómez Bravo/Javier Padillo. Hospital Universitario Virgen del Rocio. Sevilla.

Laia Blanco/J Balcells. Hospital Universitari Vall d´Hebron. Barcelona

Esteban Cugat/Maribel García Domingo. Hospital Mutua de Terrassa

Luis Muñoz Bellvis. Hospital Clínico Universitario de Salamanca

Maria Dolores Perez Diaz. Hospital General Universitario Gregorio Marañón Madrid.

Julio Santoyo Santoyo/Belinda Sanchez. Hospital Carlos Haya Málaga

Tihomir Georgiev - Grupo ICD Salud: Hospital Fundación Jiménez Díaz, Hospital Universitario Rey Juan Carlos, Hospital Universitario Infanta Elena, Hospital General de Villalba

Trinidad Villegas Virgen de las Nieves Granada

Silvino Pacho. Complejo asistencial Universitario de León

Luis Díez Valladares -- Hospital Universitario Clínico San Carlos Madrid.

Jose Rebollar. Hospital Universitario de Alava

Miguel Ángel Suárez Muñoz. Hospital Virgen de la Victoria. Málaga.

Elías Domínguez -- Complexo Hospitalario Universitario de Pontevedra.

Elena Martín Perez. Hospital La Princesa. Madrid

Laia Falgueras. Hospital Josep Trueta. Girona.

Ignasi Poves. Hospital del Mar. Barcelona

Vicenç Artigas. Hospital Sant Creu i Sant Pau. Barcelona

Luis Sabater. Hospital Clínico Universitario. Valencia

Agustin Garcia Gil, Hospital Clinico Lozano Blesa. Zaragoza.

Jose Ignacio Miota de LLama Hospital General Universitario Albacete

Gerardo Manzanet. Hospital Universitari La Plana Castellón

Jose Carlos Pino Hospital de Son Espases. Palma de Mallorca

Juan Carlos Rodríguez Sanjuán. Hospital Universitario Marqués de Valdecilla Santander.

F. Lluis – Hospital General de Alicante

Fabio Ausania - Complexo Hospitalario Universitario de Vigo.

Maialen Alkorta Zuloaga. Hospital Universitario Donostia

Jorge Escartín. Hospital Arnau de Vilanova. Lleida

Manel Salas . Hospital Germans Trias i Pujol. Barcelona

Carlos Domingo- Hospital del Dr. Peset Valencia

Enrique Artigues Sánchez de Rojas – Consorci Hospital General Universitario Valencia.

José Antonio Barreras Mateos– Hospital General Universitario de Elda. Alicante.

José María Fernández Cebrián -- Hospital Univ. Fundación Alcorcón

Beatriz Pérez Cabrera. HU San Cecilio Granada.

D.Padilla Valverde Hospital General Universitario de Ciudad Real

Alfonso Sanjuanbenito -- Hospital Universitario Ramón y Cajal Madrid.

Ignacio Iturburu Belmonte. Hospital de Basurto. Bilbao

Natalia Bejarano/F García Borobia. Hospital Parc Tauli Sabadell

Pablo Toral Guinea. Hospital Virgen de la Salud Toledo.

Aylhin Lopez Marcano. Hospital Universitario Guadalajara.

Francisco Asencio Arana. Hospital Arnau de Vilanova Valencia.

Evaristo Varo. Complexo Hospitalario Universitario de Santiago. Coruña

Rafael Esteban Instituto Valenciano de Oncología (IVO) Valencia.

Juan L Blas. Hospital Royo Vilanova Zaragoza .

José Mª Jover Navalón. Hospital Universitario de Getafe Madrid

Cristina Fernández Martínez. Hospital de Sagunto. Valencia

Enrique Daban Collado Complejo Hospitalario Jaén.

Antonio Calvo Duran Hospital Universitario Puerta del Mar Cádiz

JC Vicens / J Romero H Son Llatzer Palma de Mallorca

JM Badía Hospital de Granollers. Barcelona

Raquel Sánchez. Quirúrgica Cirujanos Asociados

Ricardo de Miguel Ibáñez H. Virgen de la Salud Cuenca.

Fernando Pardo. Clínica Universitaria de Navarra.

Carlos Francos Von Hunefeld (+). Complejo Asistencial Hospital Ntra. Sra. de Sonsoles de Àvila.

Fernando Pereira. Hospital Universitario de Fuenlabrada Madrid.

Francisco Garcia Molina Hospital de Jerez de la Frontera Cádiz.

Ignacio Rodríguez Prieto. Hospital Universitario Infanta Cristina Madrid.

Alfredo Alonso Poza /Carlos Gilsanz. Hospital Universitario del Sureste Madrid.

Jose Miguel Martínez Albert. Hospital de Manises Valencia

Miguel Angel Morcillo. Hospital de Orihuela Alicante.

Sagrario Martínez Cortijo. Hospital General Nuestra Señora del Prado. Talavera Toledo.

José Martín Fernández. Hospital Univ. Príncipe de Asturias Madrid.

Jesús Baquedano. Hospital Central de la Defensa

José Castell. Hospital Universitario La Paz. Madrid.

Javier Aguiló. Hospital Lluis Alcañis. Xátiva Valencia.

Juan Carlos Bernal. Hospital de Requena. Valencia.
